# Supplementary material
Source: PubMed Central journal article supplement (PMC11781383)
Supplement: NIHPP2024.03.28.586997v2-supplement-1.pdf [file NIHPP2024.03.28.586997v2-supplement-1.pdf]

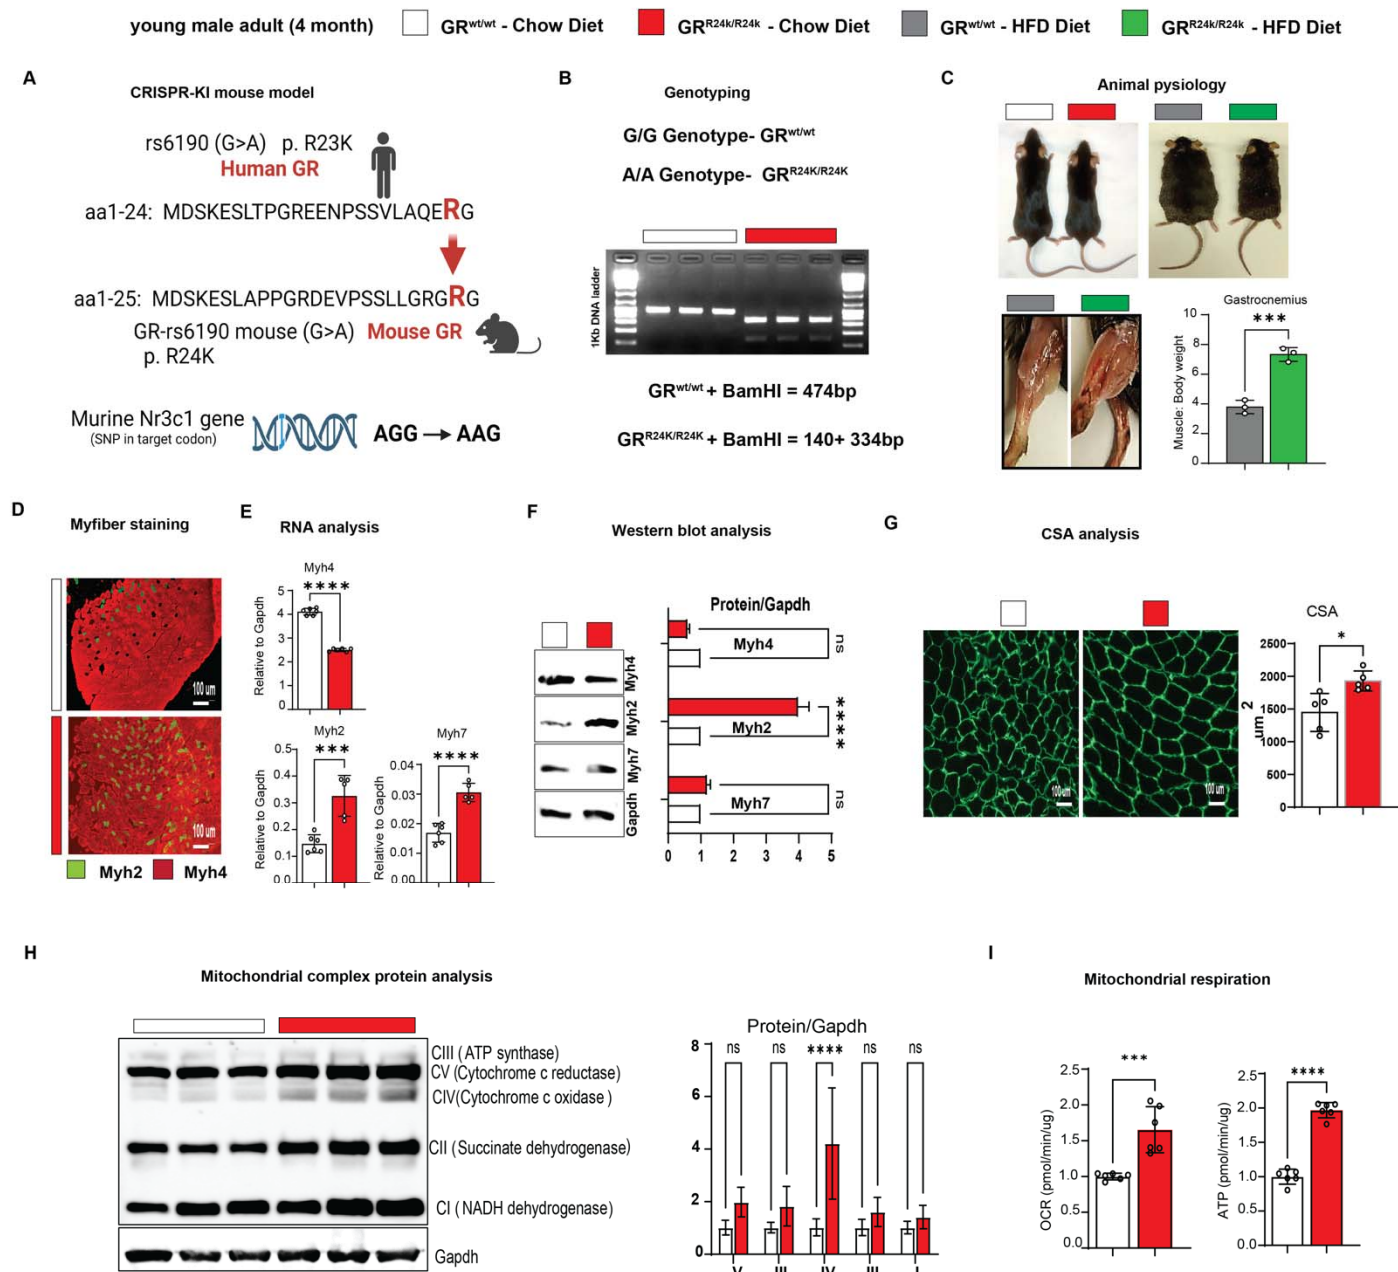

75  
76 **Supplementary Figure 1 – Additional data regarding R24K effects on muscle metabolism. Related to**  
77 **Figure 1 – (A-B)** Diagram and genotyping PCR for R24K genocopying strategy in mice of human R23K  
78 variant. **(C)** Muscle/body mass was increased by the R24K genotype in obese mice. **(D-F)** R24K muscles  
79 showed increased expression of Myh2 (type 2A) and Myh7 (type 1) myosins, with decreased Myh4 (type 2B)  
80 expression. **(G)** Cross-sectional area (CSA) analysis confirmed increased muscle mass. **(H)** Mitochondrial  
81 complex protein levels in muscle showed non-significant upward trends, with complex IV being significantly  
82 upregulated by the R24K homozygosity. **(I)** Glucose-fueled respiration was increased in muscle tissue of R24K  
83 vs WT mice. n=3-6♂/group; diet exposures for 12 weeks from 4mo to 7mo; Welch's t-tests: ns, non significant;  
84 \*, P<0.05; \*\*, P<0.01; \*\*\*, P<0.001; \*\*\*\*, P<0.0001.

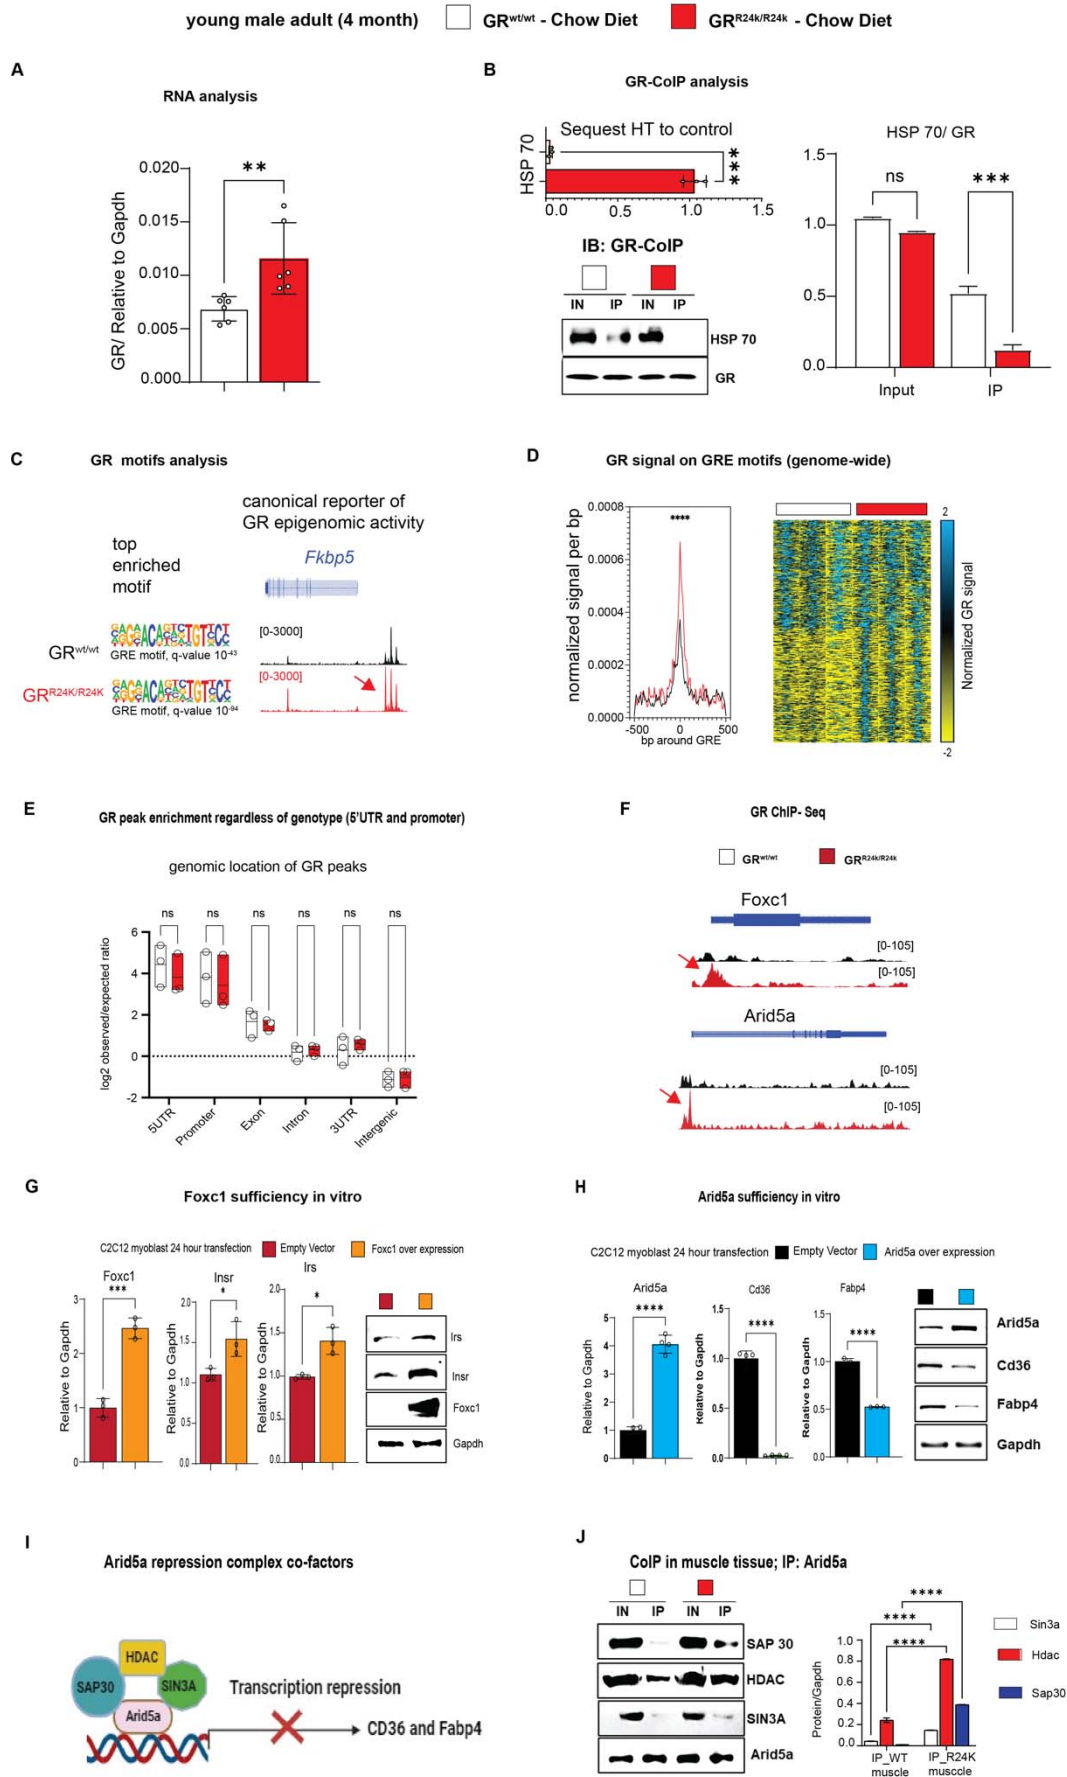

36  
37  
38

**Supplementary Figure 2 – Additional analyses related to the mutant GR in muscle – (A) Validation of lower Hsp70 binding by the mutant vs WT GR through CoIP. (B) qPCR analysis of *Nr3c1* (GR gene)**

}9 expression in muscle. **(C)** Validation of ChIP-seq datasets through unbiased motif analysis and visualization of  
}10 canonical GR peaks in the *Fkbp5* promoter region. **(D-E)** Mutant GR epigenomic activity was increased on the  
}11 GR-binding elements (GREs) genome-wide, despite no significant shifts in overall genomic location (GR peaks  
}12 enriched for both genotypes in the promoter-5'UTR regions). **(F)** Mutant vs WT GR peaks on *Foxc1* and *Arid5a*  
}13 proximal promoters. **(G-H)** Validation of *Foxc1* and *Arid5a* sufficiency for target gene programs in vitro in  
}14 C2C12 myoblasts. **(I-J)** Diagram and CoIP for *Arid5a* repression complex partners in R24k vs WT muscle. n=3-  
}15 4♂/group; Welch's t-tests and 2w ANOVA + Sidak (J): ns, non significant; \*, P<0.05; \*\*, P<0.01; \*\*\*, P<0.001;  
}16 \*\*\*\*, P<0.0001.  
}17  
}18
